# Supplementary material for: Interactions between crystalline nanospheres: comparisons between molecular dynamics simulations and continuum models
Source: Royal Society of Chemistry journal article supplement (doi:10.1039/c4ra05480f), 2014-07-31
Supplement: c4ra05480f1.pdf [file c4ra05480f1.pdf]

## Supplementary Information

### Interactions between crystalline nanospheres: comparisons between molecular dynamics simulations and continuum models

Weifu Sun,<sup>a,\*</sup> Yuchao Li,<sup>b,\*</sup> Wen Xu<sup>c</sup>, Yiu-Wing Mai<sup>a</sup>

<sup>a</sup>Centre for Advanced Materials Technology (CAMT), School of Aerospace, Mechanical and Mechatronic Engineering J07, The University of Sydney, Sydney, New South Wales 2006, Australia

<sup>b</sup>Department of Materials Science and Engineering, Liaocheng University, Liaocheng 252000, P. R. China

<sup>c</sup>College of Materials and Mineral Resources, Xi'an University of Architecture and Technology, Xi'an 710055, P. R. China

#### 1. Effect of temperature on interparticle LJ potentials and mechanical contact forces

Fig. S1-a shows that the LJ potential results obtained at different temperatures from 100 to 400 K are almost identical so that the effect of temperature can be ignored. Likewise, the mechanical force results in the same temperature range are almost identical as shown in Fig. S1-b indicating that they can also be considered independent of temperature.

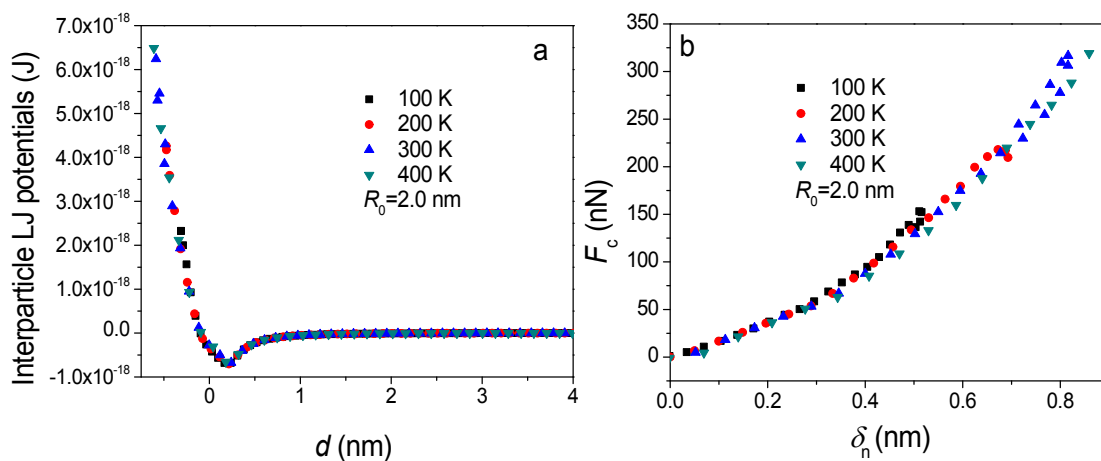

**Figure S1.** (a) Interparticle LJ potentials as a function of surface separation  $d$  and (b) mechanical contact forces  $F_c$  as a function of normal displacement  $\delta_n$  between two silicon carbide nanospheres 2.0 nm radius obtained in the approach process at an initial relative velocity of 500 m/s under different temperatures using a NVT ensemble and Berendsen thermostat method.

## 2. Supplementary nomenclature

**Table S1** Nomenclature for symbols used in this work

| Symbol                |                                                                |
|-----------------------|----------------------------------------------------------------|
| $A$                   | Hamaker constant                                               |
| $C$                   | vdW attraction interaction parameter                           |
| $\epsilon$            | potential well depth                                           |
| $\sigma$              | collision diameter of atom                                     |
| $E_{LJ}$              | interparticle Lennard-Jones potential                          |
| $R_0$                 | cut-off radius                                                 |
| $R$                   | defined particle radius $R = \bar{R}$                          |
| $\bar{R}$             | averaged radial distance of surface atoms from particle centre |
| $R^{\text{core}}$     | radius of particle core                                        |
| rms                   | surface roughness                                              |
| $\delta$              | effective surface thickness                                    |
| $\delta_{\text{Max}}$ | maximum surface thickness                                      |
| $\delta_n$            | normal displacement                                            |
| $\Delta d$            | part beyond defined particle radius                            |
| rms/ $R$              | relative surface roughness                                     |
| $d$                   | shortest surface separation of two particles                   |
| $d_{\text{min}}$      | minimum surface separation                                     |

|              |                                                            |
|--------------|------------------------------------------------------------|
| $v$          | velocity or volume of atom                                 |
| $Y$          | yield strength                                             |
| $C_0$        | characteristic velocity of a material                      |
| $\rho$       | material density or number density of atoms                |
| $\lambda$    | ratio of particle radii of two particles                   |
| $\rho_H$     | number density of atoms determined in the Hamaker approach |
| $\rho_T$     | true number density of atoms                               |
| $k_p$        | $k_p = \rho_T / \rho_H$                                    |
| $F_n$        | total normal force                                         |
| $F_{vdW}$    | van der Waals attraction force                             |
| $F_{Born}$   | short range Born repulsion force                           |
| $F_c$        | mechanical contact force                                   |
| $F_t$        | tangential force                                           |
| $F_Y$        | force along the Y-axis                                     |
| $F_Z$        | force along the Z-axis                                     |
| $\nu$        | Poisson ratio                                              |
| $Z_0$        | equilibrium separation                                     |
| $m$          | mass                                                       |
| $\delta_n^*$ | maximum normal displacement                                |

---
